# Supplementary material for: Liver-specific deletion of IGF2 mRNA binding protein-2/IMP2 reduces hepatic fatty acid oxidation and increases hepatic triglyceride accumulation
Source: PubMed Central journal article supplement (PMC6682725; doi:10.1074/jbc.ra119.008778), 2019-06-17
Supplement: supp_RA119.008778_144770_2_supp_343299_psn0pw.pdf [file supp_RA119.008778_144770_2_supp_343299_psn0pw.pdf]

## Supporting information-Reguè et.al.

**Figure S1. Body weight (A) and body composition (B) of male *Imp2ff* and *Imp2ff/Alb-Cre<sup>+/-</sup>* mice fed normal chow (NCD) or a high fat diet (HFD).** Body composition was determined using ECHO-MRI.

**Figure S2. Liver triglyceride levels in *Imp2ff* and *Imp2ff/Alb-Cre<sup>+/-</sup>* mice.** **A.** Males, 5 pairs, 10 weeks old, HFD from 4 weeks age. **B.** Females, 4 pairs, 30 weeks old, normal chow only. **C.** Females, 6 *Imp2ff*, 8 *Imp2ff/Alb-Cre<sup>+/-</sup>*, HFD from 4 weeks age. ns=p>0.05.

**Figure S3. Liver histology in *Imp2ff* and *Imp2ff/Alb-Cre<sup>+/-</sup>* mice on a high fat diet.** Liver was excised at 30 weeks age from male mice, fixed and stained with H&E. Representative sections from two pairs are shown. Scale bar=150µM.

**Table S1. Antibody sources and oligonucleotides for QPCR.**

## Antibodies

|               |                |            |
|---------------|----------------|------------|
| PPAR $\alpha$ | Santa Cruz     | sc-398394  |
| PPAR $\gamma$ | Cell Signaling | cst-2430   |
| RPL26         | Sigma          | SAB2107642 |
| CPT1A         | Abcam          | ab128568   |
| CPT2          | Abcam          | ab110293   |

## Primer List

|               |                           |                          |
|---------------|---------------------------|--------------------------|
| Acadl         | AGAAGTTCATCCCCCAGATGAC    | GGCGTTCGTTCTTACTCCTTGT   |
| Acc1          | GCGGCTACAGGGACTATACTG     | CGGAAGTAAGAGCTACTAGCGG   |
| Acc2          | GGGCTCCCTGGATGACAAC       | GCTCTTCCGGGAGGAGTTCT     |
| Acly          | AAGAAGGAGGGGAAGCTGAT      | TCGCATGTCTGGGTTGTTTA     |
| Acot7         | GAGGGTCGGAAACGCTATGAA     | GGCTGGACAATGTCTCCGTTG    |
| Agpat1        | GCTGGCTGGCAGGAATCAT       | GTCTGAGCCACCTCGGACAT     |
| Angptl4       | TCCAACGCCACCCACTTAC       | TGAAGTCATCTCACAGTTGACCA  |
| Apoa4         | CCAAGATCGACCAGAACGTGG     | GTCCTGAGCATAGGGAGCCA     |
| ApoB          | TGGGATTCCATCTGCCATCTCGAG  | GTACAGATCCATCACAGGACAATG |
| Apoc3         | GCGTGCAGGAGTCCGATATAG     | CCAGTAGCCTTTCAGGGATCT    |
| cd36          | GCTTGCAACTGTCAGCACAT      | GCCTTGCTGTAGCCAAGAAC     |
| Chrebp        | CCTTCGCCAACTCAGCACTT      | TGGCTTGCTCAGGCACAA       |
| Cpt1a         | CTATGCGCTACTCGCTGAAGG     | GGCTTTCGACCCGAGAAGA      |
| Cpt2          | GCTCCGAGGCATTTGTC         | CATCGCTGCTTCTTTGGT       |
| Dgat1         | CAGACCAGCGTGGGCG          | GAACAAAGAGTCTTGCAGACGATG |
| Eci2          | CCCTTCTGGGACTATTTGATGC    | CTTCGGAAACGTGTAAGAGGAG   |
| Fabp1         | GGAATTGGGAGTAGGAAGAGCC    | TGGACTTGAACCAAGGAGTCAT   |
| Fabp4         | AAGGTGAAGAGCATCATAACCCT   | TCACGCCTTTCATAACACATTCC  |
| Fabp5         | AAAGAGCTAGGAGTAGGACTGG    | TGTTGCCATCACACGTAATGA    |
| Fads2         | ATTCGGGAGAAGATGCTACG      | AAGAACTTGCCCACGAAGTC     |
| Fas           | GCGATGAAGAGCATGGTTTAG     | GGCTCAAGGGTTCCATGTT      |
| Fgf21         | AAAGCCTCTAGGTTTCTTTGCCA   | CCTCAGGATCAAAGTGAGGCG    |
| GAPDH         | CTGGAGAAACCTGCCAAGTA      | TGTTGCTGTAGCCGTATTCA     |
| Gpat          | ACGCACACAAGGCACAGAG       | TGCTGCTCAGTACATTCTCAGTA  |
| Imp2          | GACTACCCCGACCAGAACTG      | GAGGCGGGATGTTCCGAATC     |
| Lipin 1       | GAGCATGCCAAGACCAACATC     | CAATGGGAAGACGTGATCGA     |
| Lpl           | ACTCTGTGTCTAACTGCCACTTCAA | ATACATTCCCGTTACCGTCCAT   |
| Mtp           | TATGGAGATCCAGGGTGGTC      | CTGCTTTCCACACCAGCTTT     |
| Ppara         | TCGAGGAAGGCACTACACCT      | TCTTCCCAAAGCTCCTTCAA     |
| Ppar $\gamma$ | CGCTGATGCACTGCCTATGA      | AGAGGTCCACAGAGCTGATTCC   |
| scd1          | CTGTACGGGATCATACTGGTTC    | GCCGTGCCTTGTAAGTTCTG     |
| Screbp2       | AGCCAAGGAGAGCCTGTACTG     | GAGAGCGCACAGCTGCATCG     |
| Srebp1c       | GGAGCCATGGATTGCACATT      | GGCCCGGGAAGTCACTGT       |
| 18s rRNA      | GTAACCCGTTGAACCCATT       | CCATCCAATCGGTAGTAGCG     |

**A**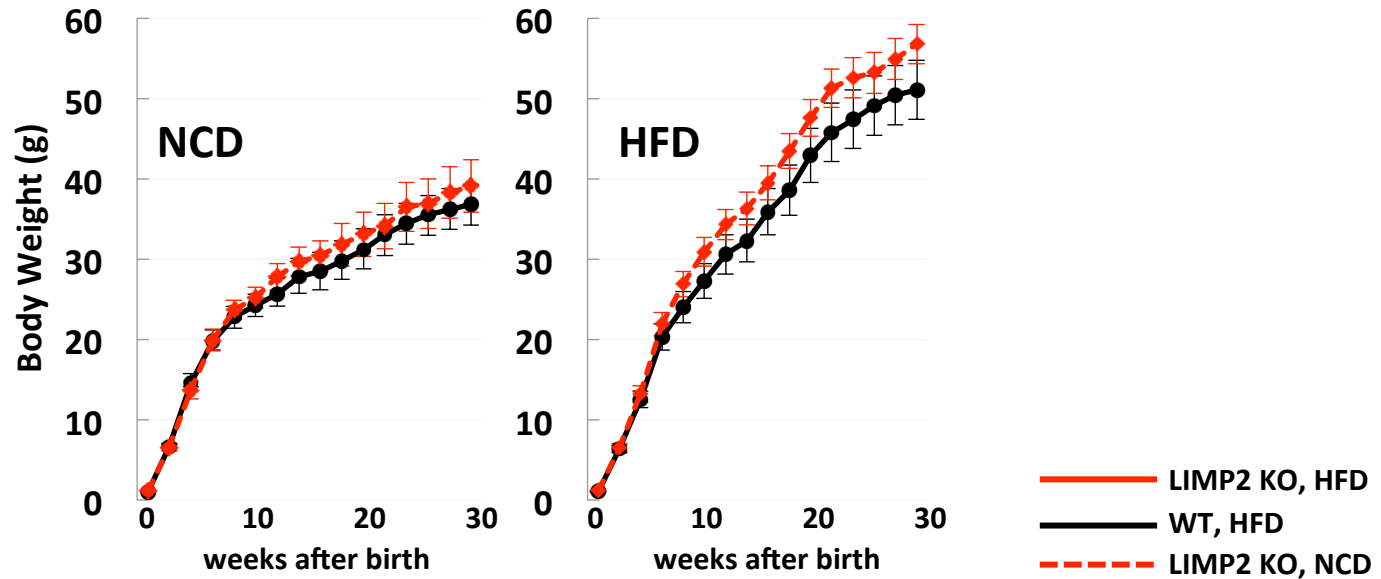**B**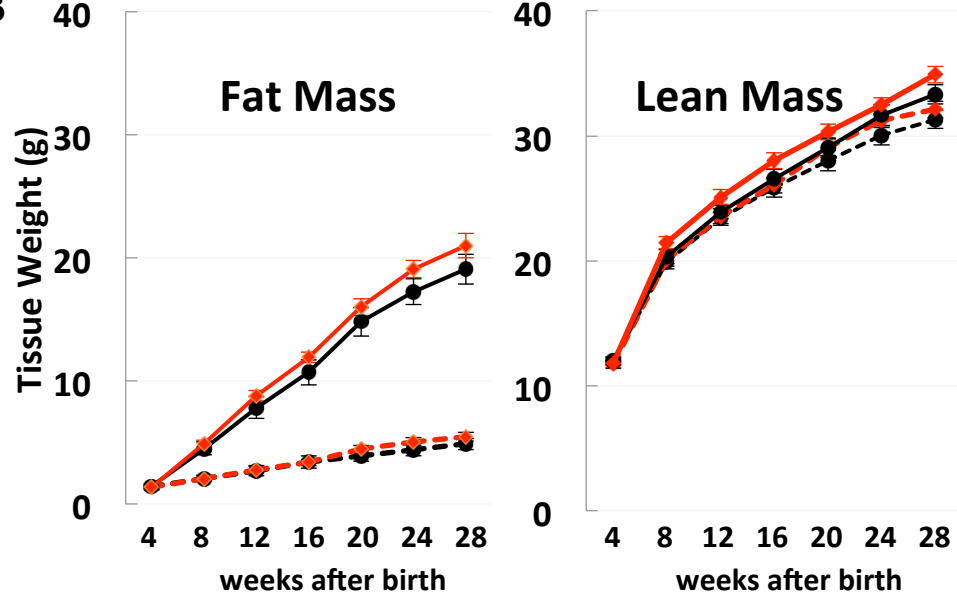

Fig. S1

**A** Liver, male, 10 weeks, HFD

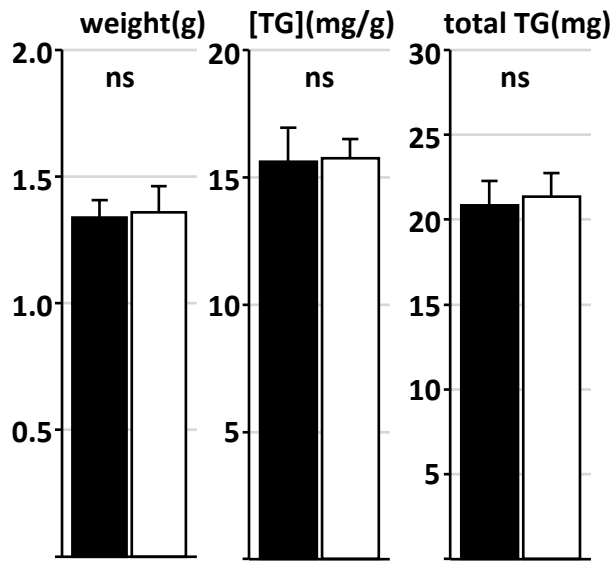

**B** Liver, female, 30 weeks, HFD

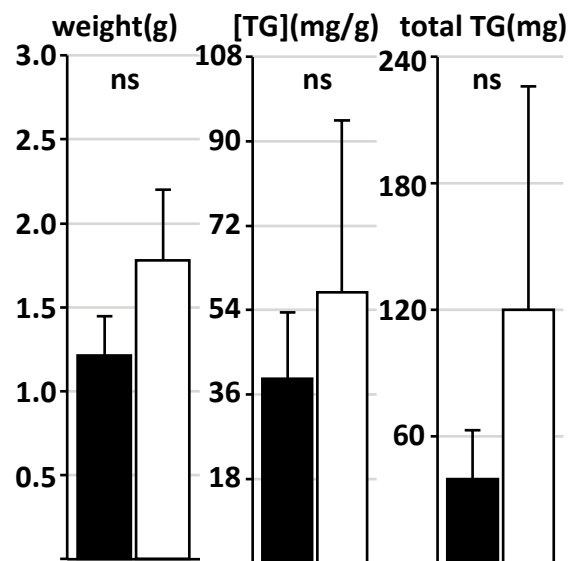

**C** Liver, female, 30 weeks, NCD

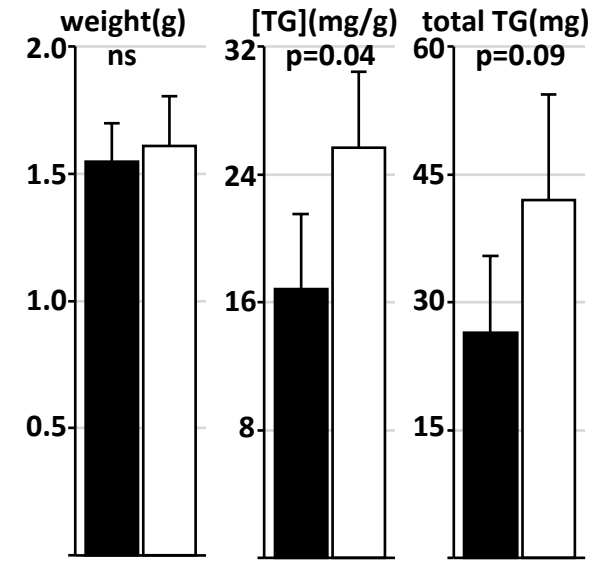

Fig. S2

**WT 1**

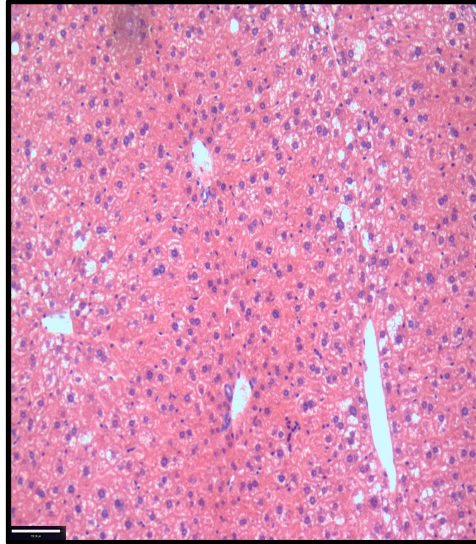

**WT 2**

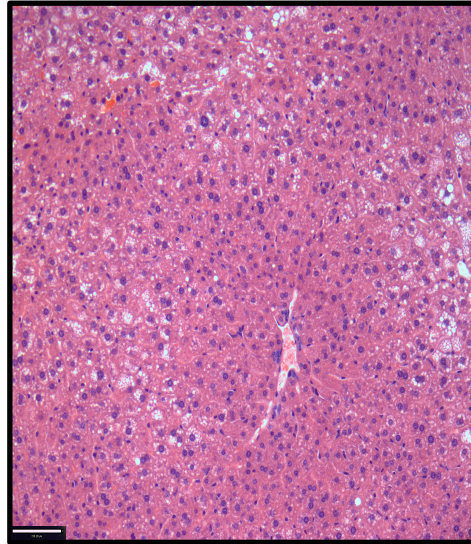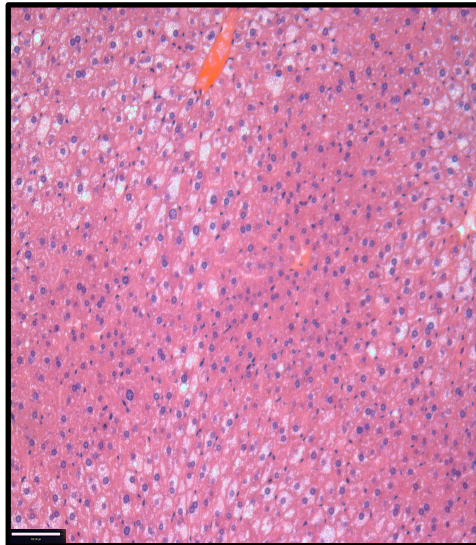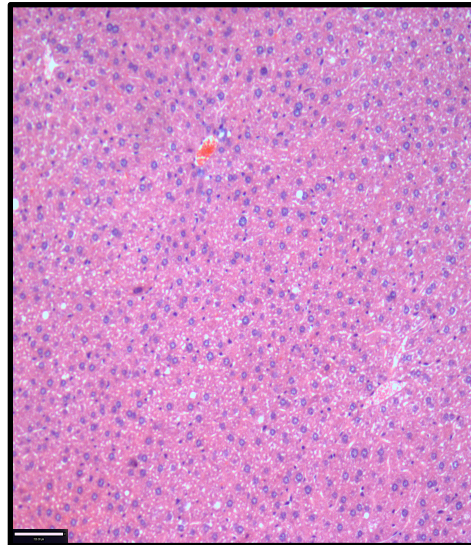

**KO 1**

**KO 2**

Fig. S3
